# Supplementary material for: Shape controllable synthesis of NdFeO3micro single crystals by a hydrothermal route
Source: Royal Society of Chemistry journal article supplement (doi:10.1039/c3ce41434e), 2013-11-15
Supplement: c3ce41434e.pdf [file c3ce41434e.pdf]

Supporting information for:

## Shape Controllable Synthesis of NdFeO<sub>3</sub> Micro Single Crystals by a Hydrothermal Route

You Wang,<sup>a)</sup> Xuecheng Yan,<sup>a)</sup> Jun Chen,<sup>a)</sup> Jinxia Deng,<sup>b)</sup> Ranbo Yu,<sup>a)</sup> and Xianran

Xing<sup>a)</sup>\*

<sup>a)</sup>Department of Physical Chemistry, University of Science and Technology Beijing, Beijing 100083, China

<sup>b)</sup>Institute of Chemistry, University of Science and Technology Beijing, Beijing 100083, China

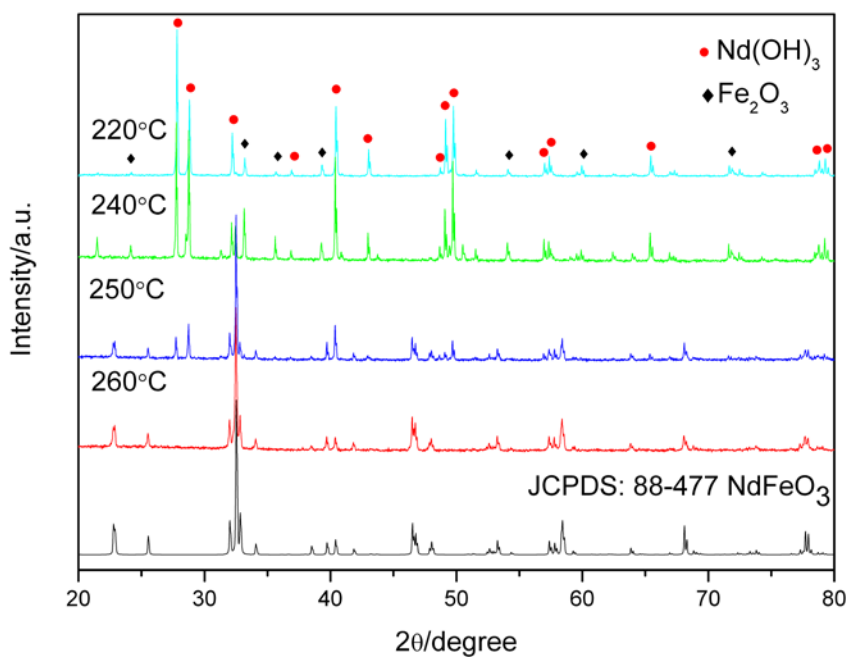

Fig s1. XRD patterns of NdFeO<sub>3</sub> synthesized at the concentration of KOH 17M for 72h under different temperature by route 1.

\* Corresponding author, email: xing@ustb.edu.cn

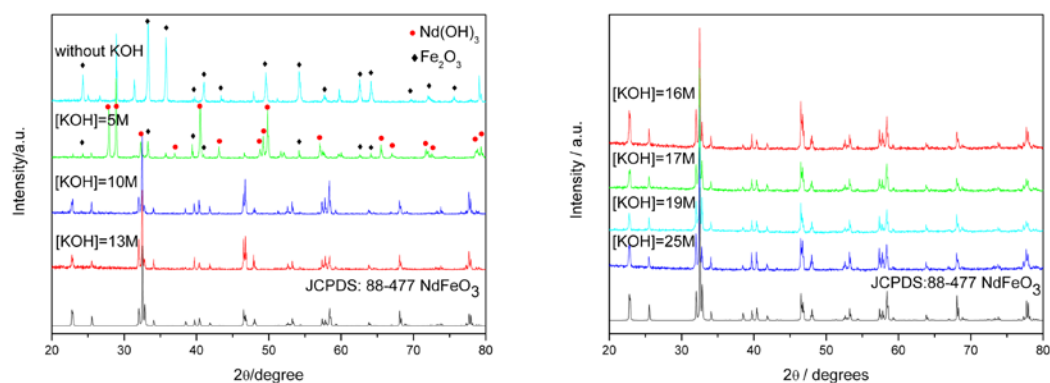

Fig s2. XRD patterns of NdFeO<sub>3</sub> synthesized at 260°C for 72h with different KOH concentration by route 1.

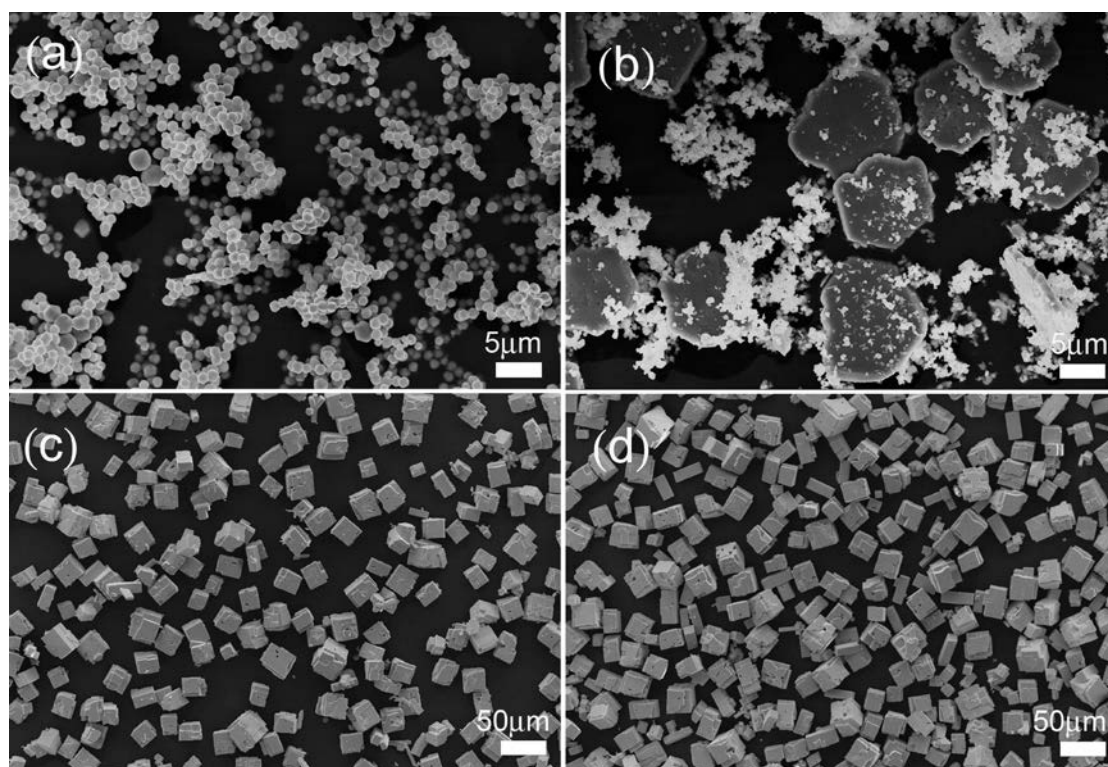

Fig s3. SEM images of NdFeO<sub>3</sub> synthesized at 260°C for 72h with different KOH concentration by route 1. a) without KOH b) [KOH]=5M c) [KOH]=10M d) [KOH]=13M.

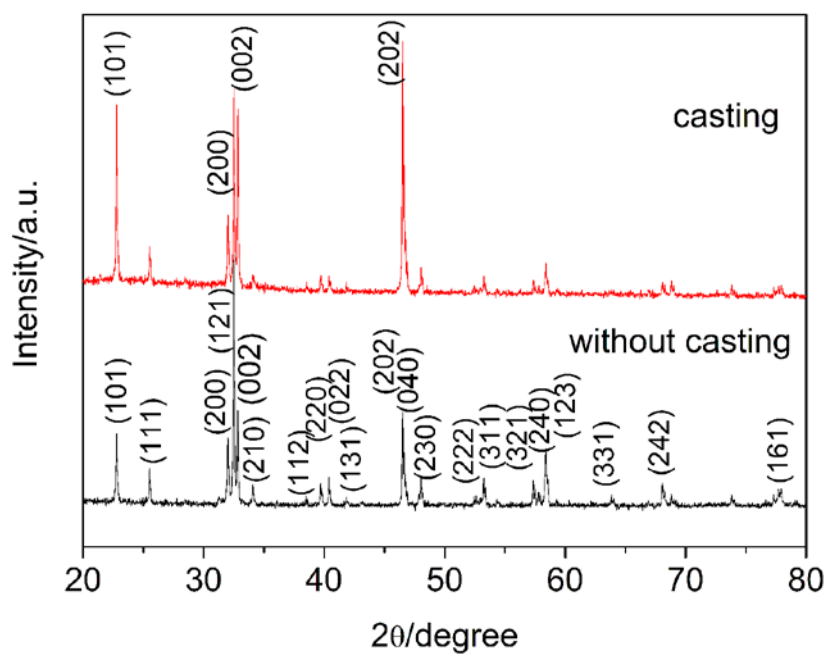

Fig. S4. XRD patterns of cast and noncast  $\text{NdFeO}_3$  particles

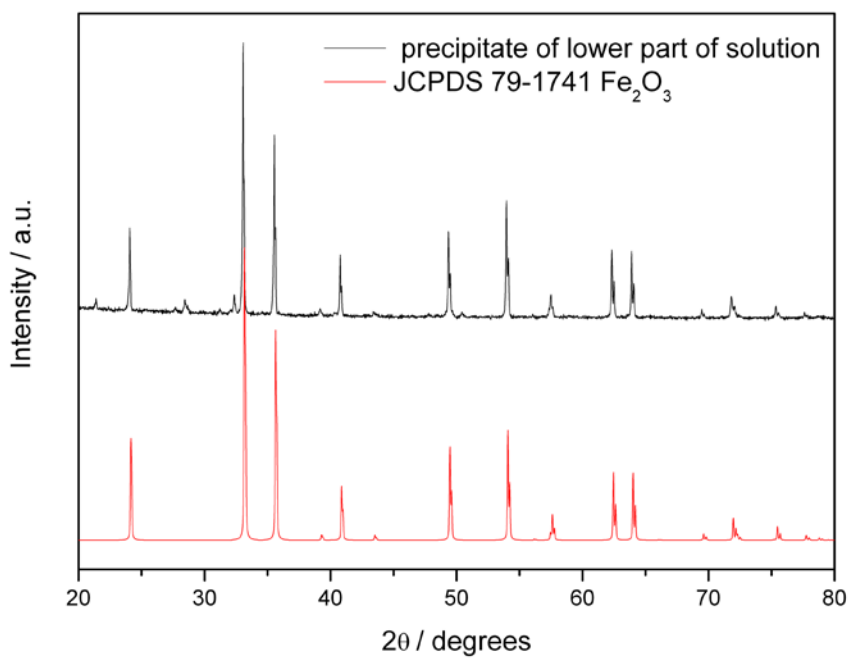

Fig. S5. XRD patterns of precipitate of under solution.

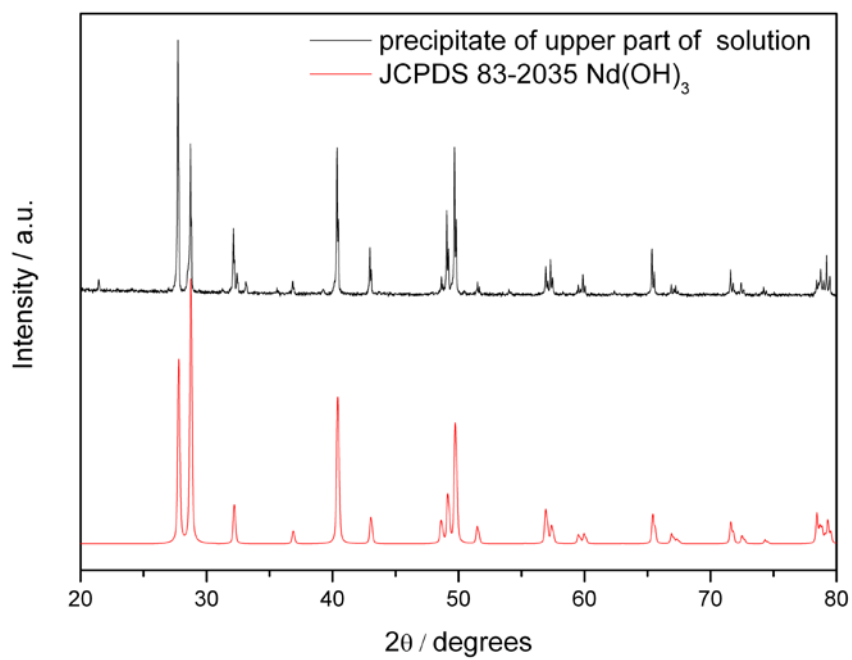

Fig. S6. XRD patterns of precipitate of upper solution.
